# Supplementary material
Source: publisher figshare collection journal article supplement (https://acs.figshare.com/ndownloader/files/4519795)
Supplement: Supplementary file 1 [file 4519795]

data_General
_audit_creation_date                  '2009-05-28'
_audit_creation_method                'by CrystalStructure 3.8'
_audit_update_record                   ?

#==============================================================================

# PROCESSING SUMMARY (IUCr Office Use Only)

_journal_date_recd_electronic     ?
_journal_date_from_coeditor       ?
_journal_date_accepted            ?
_journal_coeditor_code            ?

#==============================================================================

# SUBMISSION DETAILS

_publ_contact_author_name             'Dr. Yoshiro Yamashita'
_publ_contact_author_address     
;
Department of Electronic Chemistry
Interdisciplinary Graduate School of Science and Engineering
Tokyo Institute of Technology
Nagatsuta, Midori-ku, Yokohama 226-8502, Japan
;
_publ_contact_author_email            'yoshiro@echem.titech.ac.jp'
_publ_contact_author_fax              '+81-45-924-5571'
_publ_contact_author_phone            '+81-45-924-5489'
_publ_contact_letter
;
    ENTER TEXT OF LETTER
;
_publ_requested_journal               'Chemistry of Materials'
_publ_requested_category              'CHOOSE FI FM FO CI CM CO or AD'
_publ_requested_coeditor_name          ?

#==============================================================================

# TITLE AND AUTHOR LIST

_publ_section_title
;
    Field-Effect Transistors Based on Tetraphenyldipyranylidenes 
    and the sulfur analogues
;
_publ_section_title_footnote
;
    ENTER FOOTNOTE TO TITLE OF PAPER
;
loop_
_publ_author_name
'Altan, Bolag'
'Mamada, Masashi'
'Nishida, Jun-ichi'
'Yamashita, Yoshiro'
_publ_author_footnote
;
Department of Electronic Chemistry
Interdisciplinary Graduate School of Science and Engineering
Tokyo Institute of Technology
;
_publ_author_address
;
Nagatsuta, Midori-ku, Yokohama 226-8502, Japan
;
_publ_section_synopsis
;
  ENTER SYNOPSIS
;

#==============================================================================

# TEXT

_publ_section_abstract
;
    ENTER ABSTRACT
;
_publ_section_comment
;
    ENTER TEXT
;
_publ_section_references
;
    ENTER OTHER REFERENCES

    Rigaku Americas and Rigaku Corporation. (2007).
    CrystalStructure (Version 3.8). 
    Single Crystal Structure Analysis Software.
    Rigaku Americas, 9009 TX, USA 77381-5209.
    Rigaku, Tokyo 196-8666, Japan.

    M.C. Burla, R. Caliandro, M. Camalli, B. Carrozzini, 
    G.L. Cascarano, L. De Caro, C. Giacovazzo, G. Polidori, 
    R. Spagna (2005) 
    SIR2004

    Sheldrick, G.M. (1997). SHELXL97. University of Gottingen, Germany.

;
_publ_section_figure_captions
;
    ENTER FIGURE CAPTIONS
;
_publ_section_exptl_prep
;
    ENTER COMPOUND PREPARATION DETAILS
;
_publ_section_exptl_refinement
;
    ENTER SPECIAL DETAILS OF THE REFINEMENT
;

#==============================================================================

data__S-DIP

#==============================================================================

# CHEMICAL DATA

_chemical_formula_sum                  'C34 H24 S2 '
_chemical_formula_moiety               'C34 H24 S2 '
_chemical_formula_weight               496.68
_chemical_melting_point                ?

#==============================================================================

# CRYSTAL DATA
_symmetry_cell_setting                 monoclinic
_symmetry_space_group_name_H-M        'C 1 2/c 1'
_symmetry_space_group_name_Hall       '-C 2yc'
_symmetry_Int_Tables_number            15
loop_
_symmetry_equiv_pos_site_id
_symmetry_equiv_pos_as_xyz
1   '+X,+Y,+Z'
2   '-X,+Y,1/2-Z'
3   '-X,-Y,-Z'
4   '+X,-Y,1/2+Z'
5   '1/2+X,1/2+Y,+Z'
6   '1/2-X,1/2+Y,1/2-Z'
7   '1/2-X,1/2-Y,-Z'
8   '1/2+X,1/2-Y,1/2+Z'

#------------------------------------------------------------------------------

_cell_length_a                         27.808(3)
_cell_length_b                         5.5222(4)
_cell_length_c                         17.8631(12)
_cell_angle_alpha                      90.0000
_cell_angle_beta                       117.876(4)
_cell_angle_gamma                      90.0000
_cell_volume                           2424.8(3)
_cell_formula_units_Z                  4
_cell_measurement_reflns_used          9379
_cell_measurement_theta_min            3.1
_cell_measurement_theta_max            27.5
_cell_measurement_temperature          93.1

#------------------------------------------------------------------------------

_exptl_crystal_description            'platelet'
_exptl_crystal_colour                 'black'
_exptl_crystal_size_max                0.80
_exptl_crystal_size_mid                0.30
_exptl_crystal_size_min                0.20
_exptl_crystal_density_diffrn          1.360
_exptl_crystal_density_meas            ?
_exptl_crystal_density_method         'not measured'
_exptl_crystal_F_000                   1040.00
_exptl_absorpt_coefficient_mu          0.242
_exptl_absorpt_correction_type         none

#==============================================================================

# EXPERIMENTAL DATA

_diffrn_radiation_type                'Mo K\a'
_diffrn_radiation_wavelength           0.71075
_diffrn_measurement_device_type       'Rigaku RAXIS-RAPID'
_diffrn_measurement_method             \w
_diffrn_detector_area_resol_mean       10.00
_diffrn_reflns_number                  10791
_diffrn_reflns_av_R_equivalents        0.027
_diffrn_reflns_theta_max               27.48
_diffrn_measured_fraction_theta_max    0.985
_diffrn_reflns_theta_full              27.48
_diffrn_measured_fraction_theta_full   0.985
_diffrn_reflns_limit_h_min             -36
_diffrn_reflns_limit_h_max             36
_diffrn_reflns_limit_k_min             -6
_diffrn_reflns_limit_k_max             7
_diffrn_reflns_limit_l_min             -23
_diffrn_reflns_limit_l_max             23

#==============================================================================

# REFINEMENT DATA

_refine_special_details
;
    Refinement was performed using all reflections. The weighted 
    R-factor (wR) and goodness of fit (S) are based on F^2^.
    R-factor (gt) are based on F. The threshold expression of
    F^2^ > 2.0 sigma(F^2^) is used only for calculating R-factor (gt).
;
_reflns_number_total                   2738
_reflns_number_gt                      2398
_reflns_threshold_expression           F^2^>2.0\s(F^2^)
_refine_ls_structure_factor_coef       Fsqd
_refine_ls_R_factor_gt                 0.0418
_refine_ls_wR_factor_ref               0.1240
_refine_ls_hydrogen_treatment          refall
_refine_ls_number_reflns               2738
_refine_ls_number_parameters           164
_refine_ls_goodness_of_fit_ref         1.116
_refine_ls_weighting_scheme            calc
_refine_ls_weighting_details
   'w = 1/[\s^2^(Fo^2^)+(0.0649P)^2^+3.2448P] where P=(Fo^2^+2Fc^2^)/3'
_refine_ls_shift/su_max                0.0020
_refine_diff_density_max               0.60
_refine_diff_density_min               -0.33
_refine_ls_extinction_method           none
_refine_ls_extinction_coef             ?

loop_
_atom_type_symbol
_atom_type_description
_atom_type_scat_dispersion_real
_atom_type_scat_dispersion_imag
_atom_type_scat_source
  'C' 'C'  0.003 0.002 
;
International Tables for Crystallography
(1992, Vol. C, Tables 4.2.6.8 and 6.1.1.4)
;
  'H' 'H'  0.000 0.000 
;
International Tables for Crystallography
(1992, Vol. C, Table 6.1.1.4)
;
  'S' 'S'  0.125 0.123 
;
International Tables for Crystallography
(1992, Vol. C, Tables 4.2.6.8 and 6.1.1.4)
;

#==============================================================================

# ATOMIC COORDINATES AND THERMAL PARAMETERS

loop_
_atom_site_label
_atom_site_type_symbol
_atom_site_fract_x
_atom_site_fract_y
_atom_site_fract_z
_atom_site_U_iso_or_equiv
_atom_site_adp_type
_atom_site_occupancy
_atom_site_symmetry_multiplicity
_atom_site_calc_flag
_atom_site_refinement_flags
_atom_site_disorder_assembly
_atom_site_disorder_group
 S(1) S 0.038616(17) 0.04639(9) 0.68447(3) 0.02312(15) Uani 1.00 1 d . . .
 C(1) C -0.02223(6) 0.0625(2) 0.58897(10) 0.0155(3) Uani 1.00 1 d . . .
 C(2) C -0.03008(6) 0.2245(3) 0.52769(10) 0.0162(3) Uani 1.00 1 d . . .
 C(3) C 0.00785(6) 0.4082(2) 0.53015(10) 0.0156(3) Uani 1.00 1 d . . .
 C(4) C 0.06359(6) 0.3851(3) 0.59636(10) 0.0170(3) Uani 1.00 1 d . . .
 C(5) C 0.08202(6) 0.2389(2) 0.66479(10) 0.0162(3) Uani 1.00 1 d . . .
 C(6) C -0.06463(6) -0.1111(3) 0.58297(10) 0.0167(3) Uani 1.00 1 d . . .
 C(7) C -0.11978(7) -0.0671(3) 0.52686(11) 0.0219(3) Uani 1.00 1 d . . .
 C(8) C -0.15993(7) -0.2274(3) 0.52087(12) 0.0263(4) Uani 1.00 1 d . . .
 C(9) C -0.14650(8) -0.4327(3) 0.57134(12) 0.0241(3) Uani 1.00 1 d . . .
 C(10) C -0.09237(8) -0.4773(3) 0.62783(12) 0.0220(3) Uani 1.00 1 d . . .
 C(11) C -0.05182(7) -0.3187(3) 0.63309(10) 0.0186(3) Uani 1.00 1 d . . .
 C(12) C 0.13973(6) 0.2315(3) 0.73150(10) 0.0173(3) Uani 1.00 1 d . . .
 C(13) C 0.17626(7) 0.4167(3) 0.73904(11) 0.0230(3) Uani 1.00 1 d . . .
 C(14) C 0.23011(7) 0.4110(3) 0.80208(12) 0.0259(4) Uani 1.00 1 d . . .
 C(15) C 0.24874(7) 0.2227(3) 0.86006(12) 0.0252(3) Uani 1.00 1 d . . .
 C(16) C 0.21293(8) 0.0402(3) 0.85406(13) 0.0276(4) Uani 1.00 1 d . . .
 C(17) C 0.15915(7) 0.0435(3) 0.79070(12) 0.0244(3) Uani 1.00 1 d . . .
 H(1) H -0.0640 0.2173 0.4777 0.019 Uiso 1.00 1 c R . .
 H(2) H 0.0899 0.4831 0.5910 0.020 Uiso 1.00 1 c R . .
 H(3) H -0.1297 0.0743 0.4926 0.026 Uiso 1.00 1 c R . .
 H(4) H -0.1969 -0.1961 0.4819 0.032 Uiso 1.00 1 c R . .
 H(5) H -0.1741 -0.5416 0.5673 0.029 Uiso 1.00 1 c R . .
 H(6) H -0.0828 -0.6165 0.6631 0.026 Uiso 1.00 1 c R . .
 H(7) H -0.0149 -0.3528 0.6715 0.022 Uiso 1.00 1 c R . .
 H(8) H 0.1640 0.5485 0.7004 0.028 Uiso 1.00 1 c R . .
 H(9) H 0.2543 0.5370 0.8054 0.031 Uiso 1.00 1 c R . .
 H(10) H 0.2855 0.2188 0.9032 0.030 Uiso 1.00 1 c R . .
 H(11) H 0.2253 -0.0890 0.8938 0.033 Uiso 1.00 1 c R . .
 H(12) H 0.1353 -0.0838 0.7876 0.029 Uiso 1.00 1 c R . .


loop_
_atom_site_aniso_label
_atom_site_aniso_U_11
_atom_site_aniso_U_22
_atom_site_aniso_U_33
_atom_site_aniso_U_12
_atom_site_aniso_U_13
_atom_site_aniso_U_23
 S(1) 0.0172(2) 0.0299(2) 0.0165(2) -0.00662(16) 0.00313(17) 0.00705(17)
 C(1) 0.0139(7) 0.0151(7) 0.0151(7) -0.0001(5) 0.0048(6) -0.0025(6)
 C(2) 0.0136(7) 0.0161(7) 0.0160(7) 0.0007(5) 0.0044(5) -0.0004(6)
 C(3) 0.0154(7) 0.0150(7) 0.0165(7) 0.0004(5) 0.0074(6) -0.0007(6)
 C(4) 0.0154(7) 0.0150(7) 0.0199(7) -0.0008(5) 0.0076(6) 0.0010(6)
 C(5) 0.0151(7) 0.0153(7) 0.0177(7) -0.0005(5) 0.0073(6) -0.0009(6)
 C(6) 0.0181(7) 0.0157(7) 0.0155(7) -0.0029(6) 0.0071(6) -0.0037(6)
 C(7) 0.0198(8) 0.0206(8) 0.0215(8) -0.0031(6) 0.0064(7) 0.0024(6)
 C(8) 0.0196(8) 0.0280(9) 0.0264(8) -0.0075(7) 0.0067(7) -0.0012(7)
 C(9) 0.0261(9) 0.0203(8) 0.0291(9) -0.0096(6) 0.0155(7) -0.0069(7)
 C(10) 0.0302(9) 0.0158(7) 0.0245(8) -0.0017(6) 0.0167(7) 0.0002(7)
 C(11) 0.0210(8) 0.0176(8) 0.0182(7) 0.0011(6) 0.0100(6) -0.0012(6)
 C(12) 0.0158(7) 0.0173(7) 0.0175(7) 0.0012(5) 0.0067(6) -0.0009(6)
 C(13) 0.0213(8) 0.0221(8) 0.0207(8) -0.0022(6) 0.0058(7) 0.0030(7)
 C(14) 0.0192(8) 0.0285(9) 0.0252(8) -0.0054(6) 0.0064(7) -0.0000(7)
 C(15) 0.0155(7) 0.0307(9) 0.0239(8) 0.0019(6) 0.0046(6) 0.0003(7)
 C(16) 0.0205(8) 0.0276(9) 0.0288(9) 0.0049(6) 0.0065(7) 0.0106(8)
 C(17) 0.0183(8) 0.0223(8) 0.0286(9) 0.0004(6) 0.0077(7) 0.0067(7)

#==============================================================================

_computing_data_collection            'PROCESS-AUTO'
_computing_cell_refinement            'PROCESS-AUTO'
_computing_data_reduction             'CrystalStructure'
_computing_structure_solution         'SIR2004'
_computing_structure_refinement       'SHELXL'
_computing_publication_material       'CrystalStructure 3.8'
_computing_molecular_graphics          ?

#==============================================================================

# MOLECULAR GEOMETRY

_geom_special_details
;
    ENTER SPECIAL DETAILS OF THE MOLECULAR GEOMETRY
;

loop_
_geom_bond_atom_site_label_1
_geom_bond_atom_site_label_2
_geom_bond_distance
_geom_bond_publ_flag
_geom_bond_site_symmetry_1
_geom_bond_site_symmetry_2
S(1) C(1) 1.7555(13) yes . .
S(1) C(5) 1.7626(19) yes . .
C(1) C(2) 1.350(2) yes . .
C(1) C(6) 1.484(2) yes . .
C(2) C(3) 1.449(2) yes . .
C(3) C(3) 1.393(2) yes . 3_566
C(3) C(4) 1.4503(18) yes . .
C(4) C(5) 1.350(2) yes . .
C(5) C(12) 1.4862(18) yes . .
C(6) C(7) 1.407(2) yes . .
C(6) C(11) 1.394(2) yes . .
C(7) C(8) 1.389(2) yes . .
C(8) C(9) 1.386(2) yes . .
C(9) C(10) 1.387(2) yes . .
C(10) C(11) 1.396(2) yes . .
C(12) C(13) 1.403(2) yes . .
C(12) C(17) 1.398(2) yes . .
C(13) C(14) 1.391(2) yes . .
C(14) C(15) 1.386(2) yes . .
C(15) C(16) 1.385(2) yes . .
C(16) C(17) 1.391(2) yes . .
C(2) H(1) 0.950 no . .
C(4) H(2) 0.950 no . .
C(7) H(3) 0.950 no . .
C(8) H(4) 0.950 no . .
C(9) H(5) 0.950 no . .
C(10) H(6) 0.950 no . .
C(11) H(7) 0.950 no . .
C(13) H(8) 0.950 no . .
C(14) H(9) 0.950 no . .
C(15) H(10) 0.950 no . .
C(16) H(11) 0.950 no . .
C(17) H(12) 0.950 no . .

loop_
_geom_angle_atom_site_label_1
_geom_angle_atom_site_label_2
_geom_angle_atom_site_label_3
_geom_angle
_geom_angle_publ_flag
_geom_angle_site_symmetry_1
_geom_angle_site_symmetry_2
_geom_angle_site_symmetry_3
C(1) S(1) C(5) 102.38(8) yes . . .
S(1) C(1) C(2) 122.58(12) yes . . .
S(1) C(1) C(6) 114.18(11) yes . . .
C(2) C(1) C(6) 123.21(12) yes . . .
C(1) C(2) C(3) 126.85(12) yes . . .
C(2) C(3) C(3) 121.72(12) yes . . 3_566
C(2) C(3) C(4) 116.65(14) yes . . .
C(3) C(3) C(4) 121.58(15) yes 3_566 . .
C(3) C(4) C(5) 126.83(16) yes . . .
S(1) C(5) C(4) 122.39(11) yes . . .
S(1) C(5) C(12) 114.01(12) yes . . .
C(4) C(5) C(12) 123.56(16) yes . . .
C(1) C(6) C(7) 120.29(14) yes . . .
C(1) C(6) C(11) 121.93(12) yes . . .
C(7) C(6) C(11) 117.76(16) yes . . .
C(6) C(7) C(8) 120.92(16) yes . . .
C(7) C(8) C(9) 120.57(15) yes . . .
C(8) C(9) C(10) 119.27(19) yes . . .
C(9) C(10) C(11) 120.35(16) yes . . .
C(6) C(11) C(10) 121.11(14) yes . . .
C(5) C(12) C(13) 121.26(14) yes . . .
C(5) C(12) C(17) 121.15(15) yes . . .
C(13) C(12) C(17) 117.56(13) yes . . .
C(12) C(13) C(14) 121.21(16) yes . . .
C(13) C(14) C(15) 120.46(18) yes . . .
C(14) C(15) C(16) 118.95(14) yes . . .
C(15) C(16) C(17) 120.93(18) yes . . .
C(12) C(17) C(16) 120.89(17) yes . . .
C(1) C(2) H(1) 116.6 no . . .
C(3) C(2) H(1) 116.6 no . . .
C(3) C(4) H(2) 116.6 no . . .
C(5) C(4) H(2) 116.6 no . . .
C(6) C(7) H(3) 119.5 no . . .
C(8) C(7) H(3) 119.5 no . . .
C(7) C(8) H(4) 119.7 no . . .
C(9) C(8) H(4) 119.7 no . . .
C(8) C(9) H(5) 120.4 no . . .
C(10) C(9) H(5) 120.4 no . . .
C(9) C(10) H(6) 119.8 no . . .
C(11) C(10) H(6) 119.8 no . . .
C(6) C(11) H(7) 119.4 no . . .
C(10) C(11) H(7) 119.4 no . . .
C(12) C(13) H(8) 119.4 no . . .
C(14) C(13) H(8) 119.4 no . . .
C(13) C(14) H(9) 119.8 no . . .
C(15) C(14) H(9) 119.8 no . . .
C(14) C(15) H(10) 120.5 no . . .
C(16) C(15) H(10) 120.5 no . . .
C(15) C(16) H(11) 119.5 no . . .
C(17) C(16) H(11) 119.5 no . . .
C(12) C(17) H(12) 119.6 no . . .
C(16) C(17) H(12) 119.6 no . . .

loop_
_geom_torsion_atom_site_label_1
_geom_torsion_atom_site_label_2
_geom_torsion_atom_site_label_3
_geom_torsion_atom_site_label_4
_geom_torsion
_geom_torsion_publ_flag
_geom_torsion_site_symmetry_1
_geom_torsion_site_symmetry_2
_geom_torsion_site_symmetry_3
_geom_torsion_site_symmetry_4
C(1) S(1) C(5) C(4) 10.74(18) ? . . . .
C(1) S(1) C(5) C(12) -171.37(13) ? . . . .
C(5) S(1) C(1) C(2) -10.02(19) ? . . . .
C(5) S(1) C(1) C(6) 171.96(13) ? . . . .
S(1) C(1) C(2) C(3) -1.3(2) ? . . . .
S(1) C(1) C(6) C(7) 157.74(15) ? . . . .
S(1) C(1) C(6) C(11) -20.9(2) ? . . . .
C(2) C(1) C(6) C(7) -20.3(2) ? . . . .
C(2) C(1) C(6) C(11) 161.05(19) ? . . . .
C(6) C(1) C(2) C(3) 176.55(18) ? . . . .
C(1) C(2) C(3) C(4) 13.9(2) ? . . . .
C(1) C(2) C(3) C(3) -168.78(19) ? . . . 3_566
C(2) C(3) C(3) C(4) 2.8(2) ? . . 3_566 3_566
C(2) C(3) C(4) C(5) -13.0(2) ? . . . .
C(3) C(3) C(4) C(5) 169.64(19) ? 3_566 . . .
C(4) C(3) C(3) C(2) -2.8(2) ? . . 3_566 3_566
C(3) C(4) C(5) S(1) -0.3(2) ? . . . .
C(3) C(4) C(5) C(12) -177.95(17) ? . . . .
S(1) C(5) C(12) C(13) -161.82(16) ? . . . .
S(1) C(5) C(12) C(17) 16.1(2) ? . . . .
C(4) C(5) C(12) C(13) 16.0(3) ? . . . .
C(4) C(5) C(12) C(17) -166.01(19) ? . . . .
C(1) C(6) C(7) C(8) -179.69(19) ? . . . .
C(1) C(6) C(11) C(10) 178.63(19) ? . . . .
C(7) C(6) C(11) C(10) -0.1(2) ? . . . .
C(11) C(6) C(7) C(8) -0.9(3) ? . . . .
C(6) C(7) C(8) C(9) 1.1(3) ? . . . .
C(7) C(8) C(9) C(10) -0.3(3) ? . . . .
C(8) C(9) C(10) C(11) -0.7(3) ? . . . .
C(9) C(10) C(11) C(6) 0.9(3) ? . . . .
C(5) C(12) C(13) C(14) 179.3(2) ? . . . .
C(5) C(12) C(17) C(16) -178.7(2) ? . . . .
C(13) C(12) C(17) C(16) -0.6(3) ? . . . .
C(17) C(12) C(13) C(14) 1.3(3) ? . . . .
C(12) C(13) C(14) C(15) -1.0(3) ? . . . .
C(13) C(14) C(15) C(16) 0.2(3) ? . . . .
C(14) C(15) C(16) C(17) 0.4(3) ? . . . .
C(15) C(16) C(17) C(12) -0.2(3) ? . . . .

loop_
_geom_contact_atom_site_label_1
_geom_contact_atom_site_label_2
_geom_contact_distance
_geom_contact_publ_flag
_geom_contact_site_symmetry_1
_geom_contact_site_symmetry_2
S(1) C(2) 2.7308(14) ? . .
S(1) C(3) 3.1806(17) ? . .
S(1) C(4) 2.7349(19) ? . .
S(1) C(6) 2.7238(14) ? . .
S(1) C(11) 3.0122(18) ? . .
S(1) C(12) 2.7290(16) ? . .
S(1) C(17) 2.9813(16) ? . .
C(1) C(2) 3.436(2) ? . 3_556
C(1) C(3) 2.504(2) ? . .
C(1) C(3) 3.498(2) ? . 3_556
C(1) C(4) 2.931(2) ? . .
C(1) C(5) 2.741(2) ? . .
C(1) C(7) 2.507(2) ? . .
C(1) C(10) 3.466(2) ? . 1_565
C(1) C(11) 2.517(2) ? . .
C(2) S(1) 2.7308(14) ? . .
C(2) C(1) 3.436(2) ? . 3_556
C(2) C(2) 3.387(2) ? . 3_556
C(2) C(3) 2.482(2) ? . 3_566
C(2) C(4) 2.467(2) ? . .
C(2) C(4) 2.915(2) ? . 3_566
C(2) C(5) 2.9296(18) ? . .
C(2) C(6) 2.494(2) ? . .
C(2) C(7) 2.963(2) ? . .
C(2) C(10) 3.437(3) ? . 1_565
C(2) C(11) 3.367(2) ? . 1_565
C(3) S(1) 3.1806(17) ? . .
C(3) C(1) 2.504(2) ? . .
C(3) C(1) 3.498(2) ? . 3_556
C(3) C(2) 2.482(2) ? . 3_566
C(3) C(4) 2.4818(19) ? . 3_566
C(3) C(5) 2.5047(18) ? . .
C(3) C(6) 3.500(2) ? . 3_556
C(3) C(11) 3.356(2) ? . 1_565
C(4) S(1) 2.7349(19) ? . .
C(4) C(1) 2.931(2) ? . .
C(4) C(2) 2.467(2) ? . .
C(4) C(2) 2.915(2) ? . 3_566
C(4) C(3) 2.4818(19) ? . 3_566
C(4) C(6) 3.555(2) ? . 3_556
C(4) C(12) 2.5000(18) ? . .
C(4) C(13) 2.9792(19) ? . .
C(5) C(1) 2.741(2) ? . .
C(5) C(2) 2.9296(18) ? . .
C(5) C(3) 2.5047(18) ? . .
C(5) C(13) 2.518(2) ? . .
C(5) C(17) 2.512(2) ? . .
C(6) S(1) 2.7238(14) ? . .
C(6) C(2) 2.494(2) ? . .
C(6) C(3) 3.500(2) ? . 3_556
C(6) C(4) 3.555(2) ? . 3_556
C(6) C(8) 2.432(2) ? . .
C(6) C(9) 2.817(2) ? . .
C(6) C(10) 2.430(2) ? . .
C(7) C(1) 2.507(2) ? . .
C(7) C(2) 2.963(2) ? . .
C(7) C(9) 2.411(2) ? . .
C(7) C(10) 2.771(2) ? . .
C(7) C(11) 2.398(2) ? . .
C(8) C(6) 2.432(2) ? . .
C(8) C(10) 2.393(2) ? . .
C(8) C(11) 2.770(2) ? . .
C(8) C(16) 3.525(3) ? . 2_556
C(9) C(6) 2.817(2) ? . .
C(9) C(7) 2.411(2) ? . .
C(9) C(11) 2.414(2) ? . .
C(10) C(1) 3.466(2) ? . 1_545
C(10) C(2) 3.437(3) ? . 1_545
C(10) C(6) 2.430(2) ? . .
C(10) C(7) 2.771(2) ? . .
C(10) C(8) 2.393(2) ? . .
C(11) S(1) 3.0122(18) ? . .
C(11) C(1) 2.517(2) ? . .
C(11) C(2) 3.367(2) ? . 1_545
C(11) C(3) 3.356(2) ? . 1_545
C(11) C(7) 2.398(2) ? . .
C(11) C(8) 2.770(2) ? . .
C(11) C(9) 2.414(2) ? . .
C(12) S(1) 2.7290(16) ? . .
C(12) C(4) 2.5000(18) ? . .
C(12) C(14) 2.434(2) ? . .
C(12) C(15) 2.8205(19) ? . .
C(12) C(16) 2.426(2) ? . .
C(13) C(4) 2.9792(19) ? . .
C(13) C(5) 2.518(2) ? . .
C(13) C(15) 2.410(2) ? . .
C(13) C(16) 2.762(2) ? . .
C(13) C(17) 2.395(2) ? . .
C(14) C(12) 2.434(2) ? . .
C(14) C(16) 2.387(3) ? . .
C(14) C(17) 2.771(2) ? . .
C(15) C(12) 2.8205(19) ? . .
C(15) C(13) 2.410(2) ? . .
C(15) C(17) 2.415(2) ? . .
C(16) C(8) 3.525(3) ? . 2_556
C(16) C(12) 2.426(2) ? . .
C(16) C(13) 2.762(2) ? . .
C(16) C(14) 2.387(3) ? . .
C(17) S(1) 2.9813(16) ? . .
C(17) C(5) 2.512(2) ? . .
C(17) C(13) 2.395(2) ? . .
C(17) C(14) 2.771(2) ? . .
C(17) C(15) 2.415(2) ? . .
S(1) H(1) 3.581 ? . .
S(1) H(1) 3.595 ? . 3_556
S(1) H(2) 3.586 ? . .
S(1) H(6) 3.043 ? . 2_566
S(1) H(7) 2.608 ? . .
S(1) H(7) 3.599 ? . 1_565
S(1) H(12) 2.551 ? . .
C(1) H(1) 1.968 ? . .
C(1) H(1) 3.498 ? . 3_556
C(1) H(3) 2.663 ? . .
C(1) H(6) 3.135 ? . 1_565
C(1) H(7) 2.682 ? . .
C(1) H(7) 3.515 ? . 1_565
C(2) H(2) 3.305 ? . .
C(2) H(2) 2.563 ? . 3_566
C(2) H(3) 2.671 ? . .
C(2) H(6) 3.478 ? . 1_565
C(2) H(7) 3.348 ? . 1_565
C(3) H(1) 2.057 ? . .
C(3) H(1) 2.635 ? . 3_566
C(3) H(2) 2.059 ? . .
C(3) H(2) 2.633 ? . 3_566
C(3) H(7) 3.163 ? . 1_565
C(4) H(1) 3.303 ? . .
C(4) H(1) 3.582 ? . 3_556
C(4) H(1) 2.566 ? . 3_566
C(4) H(7) 3.375 ? . 1_565
C(4) H(8) 2.685 ? . .
C(5) H(1) 3.447 ? . 3_556
C(5) H(2) 1.968 ? . .
C(5) H(6) 3.166 ? . 2_566
C(5) H(7) 3.558 ? . 1_565
C(5) H(8) 2.677 ? . .
C(5) H(12) 2.673 ? . .
C(6) H(1) 2.618 ? . .
C(6) H(2) 3.512 ? . 3_556
C(6) H(3) 2.049 ? . .
C(6) H(4) 3.286 ? . .
C(6) H(6) 3.282 ? . .
C(6) H(6) 3.232 ? . 1_565
C(6) H(7) 2.037 ? . .
C(7) H(1) 2.629 ? . .
C(7) H(2) 3.470 ? . 3_556
C(7) H(4) 2.035 ? . .
C(7) H(5) 3.269 ? . .
C(7) H(5) 3.498 ? . 1_565
C(7) H(6) 3.291 ? . 1_565
C(7) H(7) 3.260 ? . .
C(7) H(10) 3.174 ? . 8_454
C(7) H(12) 3.538 ? . 2_556
C(8) H(3) 2.033 ? . .
C(8) H(5) 2.039 ? . .
C(8) H(6) 3.252 ? . .
C(8) H(10) 3.332 ? . 8_444
C(8) H(10) 3.410 ? . 8_454
C(8) H(11) 2.967 ? . 2_556
C(8) H(11) 3.098 ? . 8_444
C(8) H(12) 3.257 ? . 2_556
C(9) H(3) 3.198 ? . 1_545
C(9) H(3) 3.263 ? . .
C(9) H(4) 2.032 ? . .
C(9) H(6) 2.034 ? . .
C(9) H(7) 3.266 ? . .
C(9) H(10) 3.127 ? . 8_444
C(9) H(11) 3.172 ? . 2_556
C(9) H(11) 3.495 ? . 8_444
C(9) H(12) 3.070 ? . 2_556
C(10) H(1) 3.554 ? . 1_545
C(10) H(3) 3.271 ? . 1_545
C(10) H(4) 3.251 ? . .
C(10) H(5) 2.039 ? . .
C(10) H(7) 2.038 ? . .
C(10) H(7) 3.496 ? . 2_556
C(10) H(12) 3.180 ? . 2_556
C(11) H(3) 3.258 ? . .
C(11) H(5) 3.273 ? . .
C(11) H(6) 2.042 ? . .
C(11) H(7) 3.100 ? . 2_556
C(11) H(12) 3.486 ? . 2_556
C(12) H(2) 2.626 ? . .
C(12) H(5) 3.492 ? . 2_566
C(12) H(6) 3.088 ? . 2_566
C(12) H(8) 2.044 ? . .
C(12) H(9) 3.287 ? . .
C(12) H(9) 3.477 ? . 6_546
C(12) H(11) 3.278 ? . .
C(12) H(12) 2.041 ? . .
C(13) H(2) 2.637 ? . .
C(13) H(5) 3.497 ? . 2_566
C(13) H(9) 2.037 ? . .
C(13) H(9) 3.192 ? . 6_546
C(13) H(10) 3.270 ? . .
C(13) H(10) 3.592 ? . 6_556
C(13) H(12) 3.258 ? . .
C(13) H(12) 3.253 ? . 1_565
C(14) H(4) 3.289 ? . 8_555
C(14) H(5) 3.368 ? . 2_566
C(14) H(8) 2.033 ? . .
C(14) H(8) 3.578 ? . 6_546
C(14) H(9) 2.987 ? . 6_546
C(14) H(10) 2.040 ? . .
C(14) H(11) 3.245 ? . .
C(14) H(11) 3.245 ? . 1_565
C(15) H(3) 3.287 ? . 8_555
C(15) H(4) 3.521 ? . 8_545
C(15) H(4) 3.283 ? . 8_555
C(15) H(5) 3.196 ? . 2_566
C(15) H(5) 3.446 ? . 8_545
C(15) H(8) 3.262 ? . .
C(15) H(8) 3.230 ? . 6_546
C(15) H(9) 2.032 ? . .
C(15) H(9) 3.092 ? . 6_546
C(15) H(11) 2.029 ? . .
C(15) H(12) 3.267 ? . .
C(16) H(4) 3.422 ? . 2_556
C(16) H(4) 3.123 ? . 8_545
C(16) H(5) 3.146 ? . 2_566
C(16) H(9) 3.276 ? . 1_545
C(16) H(9) 3.246 ? . .
C(16) H(9) 3.373 ? . 6_546
C(16) H(10) 2.039 ? . .
C(16) H(12) 2.035 ? . .
C(17) H(5) 3.298 ? . 2_566
C(17) H(6) 3.216 ? . 2_566
C(17) H(8) 3.209 ? . 1_545
C(17) H(8) 3.256 ? . .
C(17) H(9) 3.551 ? . 6_546
C(17) H(10) 3.273 ? . .
C(17) H(11) 2.035 ? . .
H(1) S(1) 3.581 ? . .
H(1) S(1) 3.595 ? . 3_556
H(1) C(1) 1.968 ? . .
H(1) C(1) 3.498 ? . 3_556
H(1) C(3) 2.057 ? . .
H(1) C(3) 2.635 ? . 3_566
H(1) C(4) 3.303 ? . .
H(1) C(4) 3.582 ? . 3_556
H(1) C(4) 2.566 ? . 3_566
H(1) C(5) 3.447 ? . 3_556
H(1) C(6) 2.618 ? . .
H(1) C(7) 2.629 ? . .
H(1) C(10) 3.554 ? . 1_565
H(1) H(2) 1.983 ? . 3_566
H(1) H(3) 2.118 ? . .
H(1) H(8) 3.354 ? . 3_566
H(2) S(1) 3.586 ? . .
H(2) C(2) 3.305 ? . .
H(2) C(2) 2.563 ? . 3_566
H(2) C(3) 2.059 ? . .
H(2) C(3) 2.633 ? . 3_566
H(2) C(5) 1.968 ? . .
H(2) C(6) 3.512 ? . 3_556
H(2) C(7) 3.470 ? . 3_556
H(2) C(12) 2.626 ? . .
H(2) C(13) 2.637 ? . .
H(2) H(1) 1.983 ? . 3_566
H(2) H(3) 3.313 ? . 3_566
H(2) H(8) 2.104 ? . .
H(3) C(1) 2.663 ? . .
H(3) C(2) 2.671 ? . .
H(3) C(6) 2.049 ? . .
H(3) C(8) 2.033 ? . .
H(3) C(9) 3.263 ? . .
H(3) C(9) 3.198 ? . 1_565
H(3) C(10) 3.271 ? . 1_565
H(3) C(11) 3.258 ? . .
H(3) C(15) 3.287 ? . 8_454
H(3) H(1) 2.118 ? . .
H(3) H(2) 3.313 ? . 3_566
H(3) H(4) 2.329 ? . .
H(3) H(5) 3.056 ? . 1_565
H(3) H(6) 3.191 ? . 1_565
H(3) H(9) 3.446 ? . 8_454
H(3) H(10) 2.428 ? . 8_454
H(4) C(6) 3.286 ? . .
H(4) C(7) 2.035 ? . .
H(4) C(9) 2.032 ? . .
H(4) C(10) 3.251 ? . .
H(4) C(14) 3.289 ? . 8_454
H(4) C(15) 3.521 ? . 8_444
H(4) C(15) 3.283 ? . 8_454
H(4) C(16) 3.422 ? . 2_556
H(4) C(16) 3.123 ? . 8_444
H(4) H(3) 2.329 ? . .
H(4) H(4) 3.359 ? . 7_446
H(4) H(5) 2.338 ? . .
H(4) H(5) 3.525 ? . 7_446
H(4) H(9) 2.924 ? . 8_454
H(4) H(10) 3.146 ? . 8_444
H(4) H(10) 2.918 ? . 8_454
H(4) H(11) 2.747 ? . 2_556
H(4) H(11) 2.320 ? . 8_444
H(5) C(7) 3.498 ? . 1_545
H(5) C(7) 3.269 ? . .
H(5) C(8) 2.039 ? . .
H(5) C(10) 2.039 ? . .
H(5) C(11) 3.273 ? . .
H(5) C(12) 3.492 ? . 2_546
H(5) C(13) 3.497 ? . 2_546
H(5) C(14) 3.368 ? . 2_546
H(5) C(15) 3.196 ? . 2_546
H(5) C(15) 3.446 ? . 8_444
H(5) C(16) 3.146 ? . 2_546
H(5) C(17) 3.298 ? . 2_546
H(5) H(3) 3.056 ? . 1_545
H(5) H(4) 2.338 ? . .
H(5) H(4) 3.525 ? . 7_446
H(5) H(6) 2.340 ? . .
H(5) H(10) 2.780 ? . 8_444
H(5) H(11) 3.547 ? . 2_546
H(5) H(11) 3.112 ? . 2_556
H(5) H(11) 3.138 ? . 8_444
H(5) H(12) 3.415 ? . 2_556
H(6) S(1) 3.043 ? . 2_546
H(6) C(1) 3.135 ? . 1_545
H(6) C(2) 3.478 ? . 1_545
H(6) C(5) 3.166 ? . 2_546
H(6) C(6) 3.232 ? . 1_545
H(6) C(6) 3.282 ? . .
H(6) C(7) 3.291 ? . 1_545
H(6) C(8) 3.252 ? . .
H(6) C(9) 2.034 ? . .
H(6) C(11) 2.042 ? . .
H(6) C(12) 3.088 ? . 2_546
H(6) C(17) 3.216 ? . 2_546
H(6) H(3) 3.191 ? . 1_545
H(6) H(5) 2.340 ? . .
H(6) H(7) 2.335 ? . .
H(6) H(7) 3.275 ? . 2_556
H(6) H(12) 3.280 ? . 2_546
H(6) H(12) 3.571 ? . 2_556
H(7) S(1) 3.599 ? . 1_545
H(7) S(1) 2.608 ? . .
H(7) C(1) 3.515 ? . 1_545
H(7) C(1) 2.682 ? . .
H(7) C(2) 3.348 ? . 1_545
H(7) C(3) 3.163 ? . 1_545
H(7) C(4) 3.375 ? . 1_545
H(7) C(5) 3.558 ? . 1_545
H(7) C(6) 2.037 ? . .
H(7) C(7) 3.260 ? . .
H(7) C(9) 3.266 ? . .
H(7) C(10) 2.038 ? . .
H(7) C(10) 3.496 ? . 2_556
H(7) C(11) 3.100 ? . 2_556
H(7) H(6) 2.335 ? . .
H(7) H(6) 3.275 ? . 2_556
H(7) H(7) 2.527 ? . 2_556
H(8) C(4) 2.685 ? . .
H(8) C(5) 2.677 ? . .
H(8) C(12) 2.044 ? . .
H(8) C(14) 2.033 ? . .
H(8) C(14) 3.578 ? . 6_556
H(8) C(15) 3.262 ? . .
H(8) C(15) 3.230 ? . 6_556
H(8) C(17) 3.256 ? . .
H(8) C(17) 3.209 ? . 1_565
H(8) H(1) 3.354 ? . 3_566
H(8) H(2) 2.104 ? . .
H(8) H(9) 2.329 ? . .
H(8) H(9) 3.560 ? . 6_556
H(8) H(10) 2.953 ? . 6_556
H(8) H(12) 2.890 ? . 1_565
H(9) C(12) 3.287 ? . .
H(9) C(12) 3.477 ? . 6_556
H(9) C(13) 2.037 ? . .
H(9) C(13) 3.192 ? . 6_556
H(9) C(14) 2.987 ? . 6_556
H(9) C(15) 2.032 ? . .
H(9) C(15) 3.092 ? . 6_556
H(9) C(16) 3.246 ? . .
H(9) C(16) 3.276 ? . 1_565
H(9) C(16) 3.373 ? . 6_556
H(9) C(17) 3.551 ? . 6_556
H(9) H(3) 3.446 ? . 8_555
H(9) H(4) 2.924 ? . 8_555
H(9) H(8) 2.329 ? . .
H(9) H(8) 3.560 ? . 6_546
H(9) H(9) 3.340 ? . 6_546
H(9) H(9) 3.340 ? . 6_556
H(9) H(10) 2.340 ? . .
H(9) H(10) 3.503 ? . 6_556
H(9) H(11) 2.932 ? . 1_565
H(10) C(7) 3.174 ? . 8_555
H(10) C(8) 3.332 ? . 8_545
H(10) C(8) 3.410 ? . 8_555
H(10) C(9) 3.127 ? . 8_545
H(10) C(13) 3.270 ? . .
H(10) C(13) 3.592 ? . 6_546
H(10) C(14) 2.040 ? . .
H(10) C(16) 2.039 ? . .
H(10) C(17) 3.273 ? . .
H(10) H(3) 2.428 ? . 8_555
H(10) H(4) 3.146 ? . 8_545
H(10) H(4) 2.918 ? . 8_555
H(10) H(5) 2.780 ? . 8_545
H(10) H(8) 2.953 ? . 6_546
H(10) H(9) 2.340 ? . .
H(10) H(9) 3.503 ? . 6_546
H(10) H(11) 2.336 ? . .
H(11) C(8) 2.967 ? . 2_556
H(11) C(8) 3.098 ? . 8_545
H(11) C(9) 3.172 ? . 2_556
H(11) C(9) 3.495 ? . 8_545
H(11) C(12) 3.278 ? . .
H(11) C(14) 3.245 ? . 1_545
H(11) C(14) 3.245 ? . .
H(11) C(15) 2.029 ? . .
H(11) C(17) 2.035 ? . .
H(11) H(4) 2.747 ? . 2_556
H(11) H(4) 2.320 ? . 8_545
H(11) H(5) 3.112 ? . 2_556
H(11) H(5) 3.547 ? . 2_566
H(11) H(5) 3.138 ? . 8_545
H(11) H(9) 2.932 ? . 1_545
H(11) H(10) 2.336 ? . .
H(11) H(12) 2.328 ? . .
H(12) S(1) 2.551 ? . .
H(12) C(5) 2.673 ? . .
H(12) C(7) 3.538 ? . 2_556
H(12) C(8) 3.257 ? . 2_556
H(12) C(9) 3.070 ? . 2_556
H(12) C(10) 3.180 ? . 2_556
H(12) C(11) 3.486 ? . 2_556
H(12) C(12) 2.041 ? . .
H(12) C(13) 3.253 ? . 1_545
H(12) C(13) 3.258 ? . .
H(12) C(15) 3.267 ? . .
H(12) C(16) 2.035 ? . .
H(12) H(5) 3.415 ? . 2_556
H(12) H(6) 3.571 ? . 2_556
H(12) H(6) 3.280 ? . 2_566
H(12) H(8) 2.890 ? . 1_545
H(12) H(11) 2.328 ? . .


#==============================================================================

# Additional structures and associated data_? identifiers
# should be added at this point if there is more than one 
# structure analysis in the CIF.

#==============================================================================

#===END

#==============================================================================

data__DIP-F

#==============================================================================

# CHEMICAL DATA

_chemical_formula_sum                  'C34 H20 F4 O2 '
_chemical_formula_moiety               'C34 H20 F4 O2 '
_chemical_formula_weight               536.52
_chemical_melting_point                ?

#==============================================================================

# CRYSTAL DATA
_symmetry_cell_setting                 triclinic
_symmetry_space_group_name_H-M        'P -1'
_symmetry_space_group_name_Hall       '-P 1'
_symmetry_Int_Tables_number            2
loop_
_symmetry_equiv_pos_site_id
_symmetry_equiv_pos_as_xyz
1   '+X,+Y,+Z'
2   '-X,-Y,-Z'

#------------------------------------------------------------------------------

_cell_length_a                         6.0810(7)
_cell_length_b                         9.2666(11)
_cell_length_c                         11.8190(14)
_cell_angle_alpha                      114.383(3)
_cell_angle_beta                       92.559(3)
_cell_angle_gamma                      91.396(3)
_cell_volume                           605.32(12)
_cell_formula_units_Z                  1
_cell_measurement_reflns_used          3556
_cell_measurement_theta_min            3.4
_cell_measurement_theta_max            27.5
_cell_measurement_temperature          93.1

#------------------------------------------------------------------------------

_exptl_crystal_description            'platelet'
_exptl_crystal_colour                 'red'
_exptl_crystal_size_max                0.60
_exptl_crystal_size_mid                0.20
_exptl_crystal_size_min                0.10
_exptl_crystal_density_diffrn          1.472
_exptl_crystal_density_meas            ?
_exptl_crystal_density_method         'not measured'
_exptl_crystal_F_000                   276.00
_exptl_absorpt_coefficient_mu          0.111
_exptl_absorpt_correction_type         none

#==============================================================================

# EXPERIMENTAL DATA

_diffrn_radiation_type                'Mo K\a'
_diffrn_radiation_wavelength           0.71075
_diffrn_measurement_device_type       'Rigaku RAXIS-RAPID'
_diffrn_measurement_method             \w
_diffrn_detector_area_resol_mean       10.00
_diffrn_reflns_number                  5944
_diffrn_reflns_av_R_equivalents        0.058
_diffrn_reflns_theta_max               27.48
_diffrn_measured_fraction_theta_max    0.984
_diffrn_reflns_theta_full              27.48
_diffrn_measured_fraction_theta_full   0.984
_diffrn_reflns_limit_h_min             -7
_diffrn_reflns_limit_h_max             7
_diffrn_reflns_limit_k_min             -11
_diffrn_reflns_limit_k_max             12
_diffrn_reflns_limit_l_min             -15
_diffrn_reflns_limit_l_max             15

#==============================================================================

# REFINEMENT DATA

_refine_special_details
;
    Refinement was performed using all reflections. The weighted 
    R-factor (wR) and goodness of fit (S) are based on F^2^.
    R-factor (gt) are based on F. The threshold expression of
    F^2^ > 2.0 sigma(F^2^) is used only for calculating R-factor (gt).
;
_reflns_number_total                   2734
_reflns_number_gt                      1281
_reflns_threshold_expression           F^2^>2.0\s(F^2^)
_refine_ls_structure_factor_coef       Fsqd
_refine_ls_R_factor_gt                 0.0509
_refine_ls_wR_factor_ref               0.1493
_refine_ls_hydrogen_treatment          refall
_refine_ls_number_reflns               2734
_refine_ls_number_parameters           182
_refine_ls_goodness_of_fit_ref         0.956
_refine_ls_weighting_scheme            calc
_refine_ls_weighting_details
   'w = 1/[\s^2^(Fo^2^)+(0.0689P)^2^+0.0001P] where P=(Fo^2^+2Fc^2^)/3'
_refine_ls_shift/su_max                0.0000
_refine_diff_density_max               0.34
_refine_diff_density_min               -0.33
_refine_ls_extinction_method           none
_refine_ls_extinction_coef             ?

loop_
_atom_type_symbol
_atom_type_description
_atom_type_scat_dispersion_real
_atom_type_scat_dispersion_imag
_atom_type_scat_source
  'C' 'C'  0.003 0.002 
;
International Tables for Crystallography
(1992, Vol. C, Tables 4.2.6.8 and 6.1.1.4)
;
  'H' 'H'  0.000 0.000 
;
International Tables for Crystallography
(1992, Vol. C, Table 6.1.1.4)
;
  'F' 'F'  0.017 0.010 
;
International Tables for Crystallography
(1992, Vol. C, Tables 4.2.6.8 and 6.1.1.4)
;
  'O' 'O'  0.011 0.006 
;
International Tables for Crystallography
(1992, Vol. C, Tables 4.2.6.8 and 6.1.1.4)
;

#==============================================================================

# ATOMIC COORDINATES AND THERMAL PARAMETERS

loop_
_atom_site_label
_atom_site_type_symbol
_atom_site_fract_x
_atom_site_fract_y
_atom_site_fract_z
_atom_site_U_iso_or_equiv
_atom_site_adp_type
_atom_site_occupancy
_atom_site_symmetry_multiplicity
_atom_site_calc_flag
_atom_site_refinement_flags
_atom_site_disorder_assembly
_atom_site_disorder_group
 F(1) F 0.5341(2) 0.83918(18) 1.05341(15) 0.0385(4) Uani 1.00 1 d . . .
 F(2) F 0.2742(2) -0.29700(17) 0.20158(15) 0.0369(4) Uani 1.00 1 d . . .
 O(1) O -0.0097(2) 0.3578(2) 0.58321(16) 0.0259(4) Uani 1.00 1 d . . .
 C(1) C -0.1328(4) 0.2681(2) 0.4724(2) 0.0227(6) Uani 1.00 1 d . . .
 C(2) C -0.3187(4) 0.3203(2) 0.4404(2) 0.0222(5) Uani 1.00 1 d . . .
 C(3) C -0.4054(4) 0.4715(2) 0.5162(2) 0.0232(6) Uani 1.00 1 d . . .
 C(4) C -0.2687(4) 0.5604(2) 0.6288(2) 0.0240(6) Uani 1.00 1 d . . .
 C(5) C -0.0826(4) 0.5060(2) 0.6579(2) 0.0218(5) Uani 1.00 1 d . . .
 C(6) C -0.0256(4) 0.1211(2) 0.4008(2) 0.0229(5) Uani 1.00 1 d . . .
 C(7) C -0.1333(4) 0.0010(3) 0.2946(2) 0.0277(6) Uani 1.00 1 d . . .
 C(8) C -0.0327(4) -0.1391(3) 0.2276(2) 0.0283(6) Uani 1.00 1 d . . .
 C(9) C 0.1762(4) -0.1586(2) 0.2661(2) 0.0257(6) Uani 1.00 1 d . . .
 C(10) C 0.2908(4) -0.0440(3) 0.3675(2) 0.0284(6) Uani 1.00 1 d . . .
 C(11) C 0.1886(4) 0.0962(3) 0.4345(2) 0.0258(6) Uani 1.00 1 d . . .
 C(12) C 0.0748(4) 0.5896(2) 0.7657(2) 0.0228(6) Uani 1.00 1 d . . .
 C(13) C 0.2644(4) 0.5196(3) 0.7845(2) 0.0271(6) Uani 1.00 1 d . . .
 C(14) C 0.4193(4) 0.6016(3) 0.8818(2) 0.0311(6) Uani 1.00 1 d . . .
 C(15) C 0.3792(4) 0.7552(3) 0.9590(2) 0.0277(6) Uani 1.00 1 d . . .
 C(16) C 0.1948(4) 0.8292(3) 0.9456(2) 0.0332(7) Uani 1.00 1 d . . .
 C(17) C 0.0418(4) 0.7457(3) 0.8491(2) 0.0305(6) Uani 1.00 1 d . . .
 H(1) H -0.3973 0.2547 0.3644 0.027 Uiso 1.00 1 c R . .
 H(2) H -0.3134 0.6615 0.6843 0.029 Uiso 1.00 1 c R . .
 H(3) H -0.2774 0.0163 0.2684 0.033 Uiso 1.00 1 c R . .
 H(4) H -0.1070 -0.2200 0.1565 0.034 Uiso 1.00 1 c R . .
 H(5) H 0.4363 -0.0602 0.3913 0.034 Uiso 1.00 1 c R . .
 H(6) H 0.2660 0.1767 0.5046 0.031 Uiso 1.00 1 c R . .
 H(7) H 0.2888 0.4132 0.7296 0.033 Uiso 1.00 1 c R . .
 H(8) H 0.5483 0.5530 0.8944 0.037 Uiso 1.00 1 c R . .
 H(9) H 0.1723 0.9355 1.0014 0.040 Uiso 1.00 1 c R . .
 H(10) H -0.0882 0.7951 0.8391 0.037 Uiso 1.00 1 c R . .


loop_
_atom_site_aniso_label
_atom_site_aniso_U_11
_atom_site_aniso_U_22
_atom_site_aniso_U_33
_atom_site_aniso_U_12
_atom_site_aniso_U_13
_atom_site_aniso_U_23
 F(1) 0.0363(10) 0.0333(8) 0.0303(9) 0.0020(7) -0.0091(7) -0.0014(7)
 F(2) 0.0419(10) 0.0255(8) 0.0337(10) 0.0147(7) 0.0081(7) 0.0015(7)
 O(1) 0.0274(10) 0.0219(8) 0.0204(9) 0.0084(7) 0.0013(7) 0.0004(7)
 C(1) 0.0278(14) 0.0205(12) 0.0150(13) 0.0008(11) 0.0030(10) 0.0024(10)
 C(2) 0.0216(13) 0.0216(12) 0.0191(14) 0.0038(11) 0.0021(10) 0.0038(11)
 C(3) 0.0219(13) 0.0217(12) 0.0214(14) 0.0037(11) 0.0052(11) 0.0038(11)
 C(4) 0.0253(14) 0.0177(12) 0.0228(14) 0.0060(11) 0.0059(11) 0.0015(10)
 C(5) 0.0254(13) 0.0186(12) 0.0187(13) 0.0059(11) 0.0086(10) 0.0040(10)
 C(6) 0.0243(13) 0.0192(12) 0.0227(14) 0.0046(10) 0.0066(10) 0.0054(10)
 C(7) 0.0275(14) 0.0261(13) 0.0260(15) 0.0052(12) 0.0039(11) 0.0067(12)
 C(8) 0.0299(14) 0.0231(13) 0.0246(15) 0.0059(11) 0.0026(12) 0.0023(11)
 C(9) 0.0314(15) 0.0187(12) 0.0235(15) 0.0105(11) 0.0094(11) 0.0040(11)
 C(10) 0.0280(14) 0.0269(13) 0.0274(15) 0.0100(12) 0.0049(12) 0.0076(12)
 C(11) 0.0246(14) 0.0241(13) 0.0234(14) 0.0058(11) 0.0033(11) 0.0043(11)
 C(12) 0.0243(14) 0.0231(12) 0.0189(14) 0.0024(11) 0.0030(10) 0.0062(11)
 C(13) 0.0281(14) 0.0226(12) 0.0236(15) 0.0105(11) 0.0030(11) 0.0017(11)
 C(14) 0.0309(15) 0.0312(14) 0.0242(15) 0.0088(13) 0.0006(12) 0.0042(12)
 C(15) 0.0303(15) 0.0257(13) 0.0178(14) -0.0001(12) -0.0025(11) 0.0002(11)
 C(16) 0.0337(16) 0.0256(14) 0.0285(16) 0.0094(13) -0.0014(13) -0.0006(12)
 C(17) 0.0288(14) 0.0266(13) 0.0267(15) 0.0115(12) -0.0010(12) 0.0013(12)

#==============================================================================

_computing_data_collection            'PROCESS-AUTO'
_computing_cell_refinement            'PROCESS-AUTO'
_computing_data_reduction             'CrystalStructure'
_computing_structure_solution         'SIR2004'
_computing_structure_refinement       'SHELXL'
_computing_publication_material       'CrystalStructure 3.8'
_computing_molecular_graphics          ?

#==============================================================================

# MOLECULAR GEOMETRY

_geom_special_details
;
    ENTER SPECIAL DETAILS OF THE MOLECULAR GEOMETRY
;

loop_
_geom_bond_atom_site_label_1
_geom_bond_atom_site_label_2
_geom_bond_distance
_geom_bond_publ_flag
_geom_bond_site_symmetry_1
_geom_bond_site_symmetry_2
F(1) C(15) 1.375(2) yes . .
F(2) C(9) 1.360(2) yes . .
O(1) C(1) 1.396(2) yes . .
O(1) C(5) 1.387(2) yes . .
C(1) C(2) 1.339(3) yes . .
C(1) C(6) 1.462(3) yes . .
C(2) C(3) 1.444(3) yes . .
C(3) C(3) 1.380(3) yes . 2_466
C(3) C(4) 1.451(3) yes . .
C(4) C(5) 1.338(3) yes . .
C(5) C(12) 1.476(3) yes . .
C(6) C(7) 1.408(3) yes . .
C(6) C(11) 1.397(3) yes . .
C(7) C(8) 1.385(3) yes . .
C(8) C(9) 1.372(3) yes . .
C(9) C(10) 1.374(3) yes . .
C(10) C(11) 1.391(3) yes . .
C(12) C(13) 1.390(3) yes . .
C(12) C(17) 1.400(3) yes . .
C(13) C(14) 1.391(3) yes . .
C(14) C(15) 1.372(3) yes . .
C(15) C(16) 1.365(4) yes . .
C(16) C(17) 1.381(3) yes . .
C(2) H(1) 0.950 no . .
C(4) H(2) 0.950 no . .
C(7) H(3) 0.950 no . .
C(8) H(4) 0.950 no . .
C(10) H(5) 0.950 no . .
C(11) H(6) 0.950 no . .
C(13) H(7) 0.950 no . .
C(14) H(8) 0.950 no . .
C(16) H(9) 0.950 no . .
C(17) H(10) 0.950 no . .

loop_
_geom_angle_atom_site_label_1
_geom_angle_atom_site_label_2
_geom_angle_atom_site_label_3
_geom_angle
_geom_angle_publ_flag
_geom_angle_site_symmetry_1
_geom_angle_site_symmetry_2
_geom_angle_site_symmetry_3
C(1) O(1) C(5) 117.7(2) yes . . .
O(1) C(1) C(2) 121.54(19) yes . . .
O(1) C(1) C(6) 110.7(2) yes . . .
C(2) C(1) C(6) 127.7(2) yes . . .
C(1) C(2) C(3) 123.1(2) yes . . .
C(2) C(3) C(3) 123.9(2) yes . . 2_466
C(2) C(3) C(4) 112.9(2) yes . . .
C(3) C(3) C(4) 123.2(2) yes 2_466 . .
C(3) C(4) C(5) 122.8(2) yes . . .
O(1) C(5) C(4) 121.97(19) yes . . .
O(1) C(5) C(12) 110.7(2) yes . . .
C(4) C(5) C(12) 127.3(2) yes . . .
C(1) C(6) C(7) 121.1(2) yes . . .
C(1) C(6) C(11) 121.10(19) yes . . .
C(7) C(6) C(11) 117.8(2) yes . . .
C(6) C(7) C(8) 121.1(2) yes . . .
C(7) C(8) C(9) 118.7(2) yes . . .
F(2) C(9) C(8) 118.84(19) yes . . .
F(2) C(9) C(10) 118.5(2) yes . . .
C(8) C(9) C(10) 122.6(2) yes . . .
C(9) C(10) C(11) 118.4(2) yes . . .
C(6) C(11) C(10) 121.4(2) yes . . .
C(5) C(12) C(13) 121.5(2) yes . . .
C(5) C(12) C(17) 120.4(2) yes . . .
C(13) C(12) C(17) 118.0(2) yes . . .
C(12) C(13) C(14) 121.6(2) yes . . .
C(13) C(14) C(15) 117.6(2) yes . . .
F(1) C(15) C(14) 118.2(2) yes . . .
F(1) C(15) C(16) 118.5(2) yes . . .
C(14) C(15) C(16) 123.2(2) yes . . .
C(15) C(16) C(17) 118.4(2) yes . . .
C(12) C(17) C(16) 121.2(2) yes . . .
C(1) C(2) H(1) 118.5 no . . .
C(3) C(2) H(1) 118.4 no . . .
C(3) C(4) H(2) 118.6 no . . .
C(5) C(4) H(2) 118.6 no . . .
C(6) C(7) H(3) 119.4 no . . .
C(8) C(7) H(3) 119.4 no . . .
C(7) C(8) H(4) 120.7 no . . .
C(9) C(8) H(4) 120.7 no . . .
C(9) C(10) H(5) 120.8 no . . .
C(11) C(10) H(5) 120.8 no . . .
C(6) C(11) H(6) 119.3 no . . .
C(10) C(11) H(6) 119.3 no . . .
C(12) C(13) H(7) 119.2 no . . .
C(14) C(13) H(7) 119.2 no . . .
C(13) C(14) H(8) 121.2 no . . .
C(15) C(14) H(8) 121.2 no . . .
C(15) C(16) H(9) 120.8 no . . .
C(17) C(16) H(9) 120.8 no . . .
C(12) C(17) H(10) 119.4 no . . .
C(16) C(17) H(10) 119.4 no . . .

loop_
_geom_torsion_atom_site_label_1
_geom_torsion_atom_site_label_2
_geom_torsion_atom_site_label_3
_geom_torsion_atom_site_label_4
_geom_torsion
_geom_torsion_publ_flag
_geom_torsion_site_symmetry_1
_geom_torsion_site_symmetry_2
_geom_torsion_site_symmetry_3
_geom_torsion_site_symmetry_4
C(1) O(1) C(5) C(4) 2.6(4) ? . . . .
C(1) O(1) C(5) C(12) -175.6(2) ? . . . .
C(5) O(1) C(1) C(2) -2.0(4) ? . . . .
C(5) O(1) C(1) C(6) 175.9(2) ? . . . .
O(1) C(1) C(2) C(3) 0.4(4) ? . . . .
O(1) C(1) C(6) C(7) 170.9(2) ? . . . .
O(1) C(1) C(6) C(11) -10.1(4) ? . . . .
C(2) C(1) C(6) C(7) -11.4(5) ? . . . .
C(2) C(1) C(6) C(11) 167.6(3) ? . . . .
C(6) C(1) C(2) C(3) -177.1(2) ? . . . .
C(1) C(2) C(3) C(4) 0.6(4) ? . . . .
C(1) C(2) C(3) C(3) 178.9(3) ? . . . 2_466
C(2) C(3) C(3) C(4) 1.9(4) ? . . 2_466 2_466
C(2) C(3) C(4) C(5) 0.0(3) ? . . . .
C(3) C(3) C(4) C(5) -178.3(3) ? 2_466 . . .
C(4) C(3) C(3) C(2) -1.9(4) ? . . 2_466 2_466
C(3) C(4) C(5) O(1) -1.7(4) ? . . . .
C(3) C(4) C(5) C(12) 176.2(2) ? . . . .
O(1) C(5) C(12) C(13) -1.2(4) ? . . . .
O(1) C(5) C(12) C(17) 175.7(2) ? . . . .
C(4) C(5) C(12) C(13) -179.3(3) ? . . . .
C(4) C(5) C(12) C(17) -2.5(5) ? . . . .
C(1) C(6) C(7) C(8) -179.2(3) ? . . . .
C(1) C(6) C(11) C(10) 179.4(3) ? . . . .
C(7) C(6) C(11) C(10) -1.6(4) ? . . . .
C(11) C(6) C(7) C(8) 1.8(4) ? . . . .
C(6) C(7) C(8) C(9) -0.6(4) ? . . . .
C(7) C(8) C(9) F(2) 179.0(2) ? . . . .
C(7) C(8) C(9) C(10) -0.8(5) ? . . . .
F(2) C(9) C(10) C(11) -178.9(2) ? . . . .
C(8) C(9) C(10) C(11) 0.9(5) ? . . . .
C(9) C(10) C(11) C(6) 0.3(4) ? . . . .
C(5) C(12) C(13) C(14) 176.1(2) ? . . . .
C(5) C(12) C(17) C(16) -175.6(3) ? . . . .
C(13) C(12) C(17) C(16) 1.3(4) ? . . . .
C(17) C(12) C(13) C(14) -0.8(4) ? . . . .
C(12) C(13) C(14) C(15) -0.3(4) ? . . . .
C(13) C(14) C(15) F(1) -178.2(2) ? . . . .
C(13) C(14) C(15) C(16) 1.0(5) ? . . . .
F(1) C(15) C(16) C(17) 178.6(2) ? . . . .
C(14) C(15) C(16) C(17) -0.5(5) ? . . . .
C(15) C(16) C(17) C(12) -0.7(5) ? . . . .

loop_
_geom_contact_atom_site_label_1
_geom_contact_atom_site_label_2
_geom_contact_distance
_geom_contact_publ_flag
_geom_contact_site_symmetry_1
_geom_contact_site_symmetry_2
F(1) F(2) 3.022(2) ? . 1_566
F(1) C(7) 3.205(2) ? . 1_666
F(1) C(8) 3.219(3) ? . 1_666
F(1) C(9) 3.391(3) ? . 1_566
F(1) C(14) 2.358(2) ? . .
F(1) C(16) 2.355(3) ? . .
F(1) C(16) 3.447(3) ? . 2_677
F(2) F(1) 3.022(2) ? . 1_544
F(2) O(1) 3.299(2) ? . 2_556
F(2) C(5) 3.253(3) ? . 2_556
F(2) C(8) 2.352(3) ? . .
F(2) C(10) 2.351(2) ? . .
F(2) C(12) 3.558(3) ? . 2_556
F(2) C(13) 3.560(3) ? . 2_656
F(2) C(14) 3.246(3) ? . 2_656
F(2) C(15) 3.187(3) ? . 1_544
O(1) F(2) 3.299(2) ? . 2_556
O(1) C(2) 2.388(3) ? . .
O(1) C(3) 2.858(3) ? . .
O(1) C(3) 3.443(3) ? . 2_566
O(1) C(4) 2.383(3) ? . .
O(1) C(4) 3.407(3) ? . 2_566
O(1) C(6) 2.353(2) ? . .
O(1) C(8) 3.591(4) ? . 2_556
O(1) C(9) 3.224(3) ? . 2_556
O(1) C(11) 2.690(2) ? . .
O(1) C(12) 2.356(2) ? . .
O(1) C(13) 2.695(2) ? . .
C(1) C(3) 2.448(3) ? . .
C(1) C(4) 2.747(3) ? . .
C(1) C(4) 3.401(4) ? . 2_566
C(1) C(5) 2.383(2) ? . .
C(1) C(5) 3.344(4) ? . 2_566
C(1) C(7) 2.499(3) ? . .
C(1) C(10) 3.481(4) ? . 2_556
C(1) C(11) 2.490(3) ? . .
C(1) C(12) 3.594(4) ? . 2_566
C(2) O(1) 2.388(3) ? . .
C(2) C(3) 2.493(3) ? . 2_466
C(2) C(4) 2.412(2) ? . .
C(2) C(4) 2.981(3) ? . 2_466
C(2) C(5) 2.744(3) ? . .
C(2) C(5) 3.392(4) ? . 2_566
C(2) C(6) 2.515(3) ? . .
C(2) C(7) 3.020(3) ? . .
C(2) C(11) 3.585(3) ? . 1_455
C(2) C(12) 3.283(4) ? . 2_566
C(2) C(13) 3.562(4) ? . 2_566
C(3) O(1) 2.858(3) ? . .
C(3) O(1) 3.443(3) ? . 2_566
C(3) C(1) 2.448(3) ? . .
C(3) C(2) 2.493(3) ? . 2_466
C(3) C(4) 2.490(3) ? . 2_466
C(3) C(5) 2.448(3) ? . .
C(4) O(1) 2.383(3) ? . .
C(4) O(1) 3.407(3) ? . 2_566
C(4) C(1) 2.747(3) ? . .
C(4) C(1) 3.401(4) ? . 2_566
C(4) C(2) 2.412(2) ? . .
C(4) C(2) 2.981(3) ? . 2_466
C(4) C(3) 2.490(3) ? . 2_466
C(4) C(6) 3.563(4) ? . 2_566
C(4) C(11) 3.585(4) ? . 2_566
C(4) C(12) 2.523(3) ? . .
C(4) C(13) 3.546(4) ? . 1_455
C(4) C(14) 3.505(4) ? . 1_455
C(4) C(17) 3.000(3) ? . .
C(5) F(2) 3.253(3) ? . 2_556
C(5) C(1) 2.383(2) ? . .
C(5) C(1) 3.344(4) ? . 2_566
C(5) C(2) 2.744(3) ? . .
C(5) C(2) 3.392(4) ? . 2_566
C(5) C(3) 2.448(3) ? . .
C(5) C(13) 2.502(3) ? . .
C(5) C(17) 2.496(3) ? . .
C(6) O(1) 2.353(2) ? . .
C(6) C(2) 2.515(3) ? . .
C(6) C(4) 3.563(4) ? . 2_566
C(6) C(8) 2.432(3) ? . .
C(6) C(9) 2.772(3) ? . .
C(6) C(10) 2.432(3) ? . .
C(6) C(10) 3.544(4) ? . 2_556
C(6) C(11) 3.483(4) ? . 2_556
C(7) F(1) 3.205(2) ? . 1_444
C(7) C(1) 2.499(3) ? . .
C(7) C(2) 3.020(3) ? . .
C(7) C(9) 2.372(3) ? . .
C(7) C(10) 2.779(4) ? . .
C(7) C(11) 2.401(3) ? . .
C(7) C(17) 3.466(4) ? . 2_566
C(8) F(1) 3.219(3) ? . 1_444
C(8) F(2) 2.352(3) ? . .
C(8) O(1) 3.591(4) ? . 2_556
C(8) C(6) 2.432(3) ? . .
C(8) C(10) 2.409(3) ? . .
C(8) C(11) 2.776(3) ? . .
C(8) C(16) 3.568(4) ? . 1_544
C(9) F(1) 3.391(3) ? . 1_544
C(9) O(1) 3.224(3) ? . 2_556
C(9) C(6) 2.772(3) ? . .
C(9) C(7) 2.372(3) ? . .
C(9) C(11) 2.375(3) ? . .
C(10) F(2) 2.351(2) ? . .
C(10) C(1) 3.481(4) ? . 2_556
C(10) C(6) 2.432(3) ? . .
C(10) C(6) 3.544(4) ? . 2_556
C(10) C(7) 2.779(4) ? . .
C(10) C(8) 2.409(3) ? . .
C(11) O(1) 2.690(2) ? . .
C(11) C(1) 2.490(3) ? . .
C(11) C(2) 3.585(3) ? . 1_655
C(11) C(4) 3.585(4) ? . 2_566
C(11) C(6) 3.483(4) ? . 2_556
C(11) C(7) 2.401(3) ? . .
C(11) C(8) 2.776(3) ? . .
C(11) C(9) 2.375(3) ? . .
C(12) F(2) 3.558(3) ? . 2_556
C(12) O(1) 2.356(2) ? . .
C(12) C(1) 3.594(4) ? . 2_566
C(12) C(2) 3.283(4) ? . 2_566
C(12) C(4) 2.523(3) ? . .
C(12) C(14) 2.427(3) ? . .
C(12) C(15) 2.755(3) ? . .
C(12) C(16) 2.423(3) ? . .
C(13) F(2) 3.560(3) ? . 2_656
C(13) O(1) 2.695(2) ? . .
C(13) C(2) 3.562(4) ? . 2_566
C(13) C(4) 3.546(4) ? . 1_655
C(13) C(5) 2.502(3) ? . .
C(13) C(15) 2.364(3) ? . .
C(13) C(16) 2.767(3) ? . .
C(13) C(17) 2.391(3) ? . .
C(14) F(1) 2.358(2) ? . .
C(14) F(2) 3.246(3) ? . 2_656
C(14) C(4) 3.505(4) ? . 1_655
C(14) C(12) 2.427(3) ? . .
C(14) C(16) 2.408(3) ? . .
C(14) C(17) 2.775(4) ? . .
C(15) F(2) 3.187(3) ? . 1_566
C(15) C(12) 2.755(3) ? . .
C(15) C(13) 2.364(3) ? . .
C(15) C(17) 2.359(3) ? . .
C(16) F(1) 2.355(3) ? . .
C(16) F(1) 3.447(3) ? . 2_677
C(16) C(8) 3.568(4) ? . 1_566
C(16) C(12) 2.423(3) ? . .
C(16) C(13) 2.767(3) ? . .
C(16) C(14) 2.408(3) ? . .
C(17) C(4) 3.000(3) ? . .
C(17) C(5) 2.496(3) ? . .
C(17) C(7) 3.466(4) ? . 2_566
C(17) C(13) 2.391(3) ? . .
C(17) C(14) 2.775(4) ? . .
C(17) C(15) 2.359(3) ? . .
F(1) H(3) 2.582 ? . 1_666
F(1) H(4) 2.630 ? . 1_666
F(1) H(8) 2.546 ? . .
F(1) H(9) 2.539 ? . .
F(1) H(9) 3.001 ? . 2_677
F(1) H(10) 3.401 ? . 1_655
F(2) H(4) 2.540 ? . .
F(2) H(5) 2.540 ? . .
F(2) H(7) 3.091 ? . 2_656
F(2) H(8) 2.468 ? . 2_656
O(1) H(1) 3.235 ? . .
O(1) H(2) 3.229 ? . .
O(1) H(6) 2.341 ? . .
O(1) H(7) 2.343 ? . .
C(1) H(1) 1.977 ? . .
C(1) H(2) 3.547 ? . 2_566
C(1) H(3) 2.664 ? . .
C(1) H(5) 3.516 ? . 2_556
C(1) H(6) 2.652 ? . .
C(2) H(2) 3.281 ? . .
C(2) H(2) 2.672 ? . 2_466
C(2) H(3) 2.736 ? . .
C(2) H(6) 3.093 ? . 1_455
C(3) H(1) 2.072 ? . .
C(3) H(1) 2.685 ? . 2_466
C(3) H(2) 2.080 ? . .
C(3) H(2) 2.680 ? . 2_466
C(3) H(6) 3.299 ? . 1_455
C(3) H(6) 3.457 ? . 2_566
C(3) H(7) 3.407 ? . 1_455
C(3) H(7) 3.576 ? . 2_566
C(4) H(1) 3.282 ? . .
C(4) H(1) 2.672 ? . 2_466
C(4) H(6) 3.406 ? . 2_566
C(4) H(7) 3.459 ? . 1_455
C(4) H(8) 3.403 ? . 1_455
C(4) H(10) 2.700 ? . .
C(5) H(2) 1.977 ? . .
C(5) H(7) 2.661 ? . .
C(5) H(8) 3.556 ? . 1_455
C(5) H(10) 2.653 ? . .
C(6) H(1) 2.705 ? . .
C(6) H(2) 3.313 ? . 2_566
C(6) H(3) 2.049 ? . .
C(6) H(4) 3.292 ? . .
C(6) H(5) 3.290 ? . .
C(6) H(6) 2.038 ? . .
C(6) H(10) 3.331 ? . 2_566
C(7) H(1) 2.736 ? . .
C(7) H(4) 2.041 ? . .
C(7) H(5) 3.035 ? . 1_455
C(7) H(6) 3.262 ? . .
C(7) H(6) 3.511 ? . 2_556
C(7) H(10) 3.227 ? . 2_566
C(8) H(3) 2.029 ? . .
C(8) H(5) 3.263 ? . .
C(8) H(7) 3.174 ? . 2_556
C(8) H(9) 3.311 ? . 1_544
C(9) H(3) 3.229 ? . .
C(9) H(4) 2.028 ? . .
C(9) H(5) 2.032 ? . .
C(9) H(6) 3.232 ? . .
C(9) H(9) 3.577 ? . 1_544
C(10) H(1) 3.332 ? . 1_655
C(10) H(3) 3.053 ? . 1_655
C(10) H(4) 3.263 ? . .
C(10) H(5) 3.006 ? . 2_656
C(10) H(6) 2.033 ? . .
C(10) H(6) 3.519 ? . 2_656
C(11) H(1) 3.194 ? . 1_655
C(11) H(2) 3.195 ? . 2_566
C(11) H(3) 3.261 ? . .
C(11) H(5) 2.048 ? . .
C(11) H(5) 3.120 ? . 2_656
C(11) H(7) 3.525 ? . .
C(12) H(1) 3.202 ? . 2_566
C(12) H(2) 2.710 ? . .
C(12) H(7) 2.030 ? . .
C(12) H(8) 3.286 ? . .
C(12) H(9) 3.282 ? . .
C(12) H(10) 2.041 ? . .
C(13) H(1) 3.347 ? . 2_566
C(13) H(2) 3.334 ? . 1_655
C(13) H(4) 3.262 ? . 2_556
C(13) H(6) 3.517 ? . .
C(13) H(8) 2.050 ? . .
C(13) H(10) 3.250 ? . .
C(14) H(2) 3.125 ? . 1_655
C(14) H(7) 2.031 ? . .
C(14) H(8) 3.490 ? . 2_667
C(14) H(9) 3.261 ? . .
C(15) H(7) 3.223 ? . .
C(15) H(8) 2.034 ? . .
C(15) H(9) 2.023 ? . .
C(15) H(10) 3.217 ? . .
C(16) H(3) 3.430 ? . 2_566
C(16) H(4) 3.330 ? . 1_566
C(16) H(8) 3.262 ? . .
C(16) H(9) 3.060 ? . 2_577
C(16) H(10) 2.025 ? . .
C(16) H(10) 3.458 ? . 2_577
C(17) H(1) 3.394 ? . 2_566
C(17) H(2) 2.712 ? . .
C(17) H(3) 3.376 ? . 2_566
C(17) H(7) 3.250 ? . .
C(17) H(9) 2.038 ? . .
C(17) H(9) 3.103 ? . 2_577
H(1) O(1) 3.235 ? . .
H(1) C(1) 1.977 ? . .
H(1) C(3) 2.072 ? . .
H(1) C(3) 2.685 ? . 2_466
H(1) C(4) 3.282 ? . .
H(1) C(4) 2.672 ? . 2_466
H(1) C(6) 2.705 ? . .
H(1) C(7) 2.736 ? . .
H(1) C(10) 3.332 ? . 1_455
H(1) C(11) 3.194 ? . 1_455
H(1) C(12) 3.202 ? . 2_566
H(1) C(13) 3.347 ? . 2_566
H(1) C(17) 3.394 ? . 2_566
H(1) H(2) 2.092 ? . 2_466
H(1) H(3) 2.187 ? . .
H(1) H(5) 3.209 ? . 1_455
H(1) H(6) 2.947 ? . 1_455
H(2) O(1) 3.229 ? . .
H(2) C(1) 3.547 ? . 2_566
H(2) C(2) 3.281 ? . .
H(2) C(2) 2.672 ? . 2_466
H(2) C(3) 2.080 ? . .
H(2) C(3) 2.680 ? . 2_466
H(2) C(5) 1.977 ? . .
H(2) C(6) 3.313 ? . 2_566
H(2) C(11) 3.195 ? . 2_566
H(2) C(12) 2.710 ? . .
H(2) C(13) 3.334 ? . 1_455
H(2) C(14) 3.125 ? . 1_455
H(2) C(17) 2.712 ? . .
H(2) H(1) 2.092 ? . 2_466
H(2) H(6) 3.182 ? . 2_566
H(2) H(7) 3.506 ? . 1_455
H(2) H(8) 3.177 ? . 1_455
H(2) H(10) 2.139 ? . .
H(3) F(1) 2.582 ? . 1_444
H(3) C(1) 2.664 ? . .
H(3) C(2) 2.736 ? . .
H(3) C(6) 2.049 ? . .
H(3) C(8) 2.029 ? . .
H(3) C(9) 3.229 ? . .
H(3) C(10) 3.053 ? . 1_455
H(3) C(11) 3.261 ? . .
H(3) C(16) 3.430 ? . 2_566
H(3) C(17) 3.376 ? . 2_566
H(3) H(1) 2.187 ? . .
H(3) H(4) 2.337 ? . .
H(3) H(5) 2.581 ? . 1_455
H(3) H(9) 3.481 ? . 2_566
H(3) H(10) 3.392 ? . 2_566
H(4) F(1) 2.630 ? . 1_444
H(4) F(2) 2.540 ? . .
H(4) C(6) 3.292 ? . .
H(4) C(7) 2.041 ? . .
H(4) C(9) 2.028 ? . .
H(4) C(10) 3.263 ? . .
H(4) C(13) 3.262 ? . 2_556
H(4) C(16) 3.330 ? . 1_544
H(4) H(3) 2.337 ? . .
H(4) H(7) 2.876 ? . 2_556
H(4) H(8) 3.498 ? . 1_444
H(4) H(9) 3.265 ? . 1_544
H(5) F(2) 2.540 ? . .
H(5) C(1) 3.516 ? . 2_556
H(5) C(6) 3.290 ? . .
H(5) C(7) 3.035 ? . 1_655
H(5) C(8) 3.263 ? . .
H(5) C(9) 2.032 ? . .
H(5) C(10) 3.006 ? . 2_656
H(5) C(11) 2.048 ? . .
H(5) C(11) 3.120 ? . 2_656
H(5) H(1) 3.209 ? . 1_655
H(5) H(3) 2.581 ? . 1_655
H(5) H(5) 2.420 ? . 2_656
H(5) H(6) 2.343 ? . .
H(5) H(6) 2.635 ? . 2_656
H(5) H(7) 3.487 ? . 2_656
H(6) O(1) 2.341 ? . .
H(6) C(1) 2.652 ? . .
H(6) C(2) 3.093 ? . 1_655
H(6) C(3) 3.299 ? . 1_655
H(6) C(3) 3.457 ? . 2_566
H(6) C(4) 3.406 ? . 2_566
H(6) C(6) 2.038 ? . .
H(6) C(7) 3.262 ? . .
H(6) C(7) 3.511 ? . 2_556
H(6) C(9) 3.232 ? . .
H(6) C(10) 2.033 ? . .
H(6) C(10) 3.519 ? . 2_656
H(6) C(13) 3.517 ? . .
H(6) H(1) 2.947 ? . 1_655
H(6) H(2) 3.182 ? . 2_566
H(6) H(5) 2.343 ? . .
H(6) H(5) 2.635 ? . 2_656
H(6) H(7) 2.652 ? . .
H(7) F(2) 3.091 ? . 2_656
H(7) O(1) 2.343 ? . .
H(7) C(3) 3.407 ? . 1_655
H(7) C(3) 3.576 ? . 2_566
H(7) C(4) 3.459 ? . 1_655
H(7) C(5) 2.661 ? . .
H(7) C(8) 3.174 ? . 2_556
H(7) C(11) 3.525 ? . .
H(7) C(12) 2.030 ? . .
H(7) C(14) 2.031 ? . .
H(7) C(15) 3.223 ? . .
H(7) C(17) 3.250 ? . .
H(7) H(2) 3.506 ? . 1_655
H(7) H(4) 2.876 ? . 2_556
H(7) H(5) 3.487 ? . 2_656
H(7) H(6) 2.652 ? . .
H(7) H(8) 2.346 ? . .
H(8) F(1) 2.546 ? . .
H(8) F(2) 2.468 ? . 2_656
H(8) C(4) 3.403 ? . 1_655
H(8) C(5) 3.556 ? . 1_655
H(8) C(12) 3.286 ? . .
H(8) C(13) 2.050 ? . .
H(8) C(14) 3.490 ? . 2_667
H(8) C(15) 2.034 ? . .
H(8) C(16) 3.262 ? . .
H(8) H(2) 3.177 ? . 1_655
H(8) H(4) 3.498 ? . 1_666
H(8) H(7) 2.346 ? . .
H(8) H(8) 3.109 ? . 2_667
H(8) H(10) 3.383 ? . 1_655
H(9) F(1) 2.539 ? . .
H(9) F(1) 3.001 ? . 2_677
H(9) C(8) 3.311 ? . 1_566
H(9) C(9) 3.577 ? . 1_566
H(9) C(12) 3.282 ? . .
H(9) C(14) 3.261 ? . .
H(9) C(15) 2.023 ? . .
H(9) C(16) 3.060 ? . 2_577
H(9) C(17) 2.038 ? . .
H(9) C(17) 3.103 ? . 2_577
H(9) H(3) 3.481 ? . 2_566
H(9) H(4) 3.265 ? . 1_566
H(9) H(9) 2.443 ? . 2_577
H(9) H(10) 2.335 ? . .
H(9) H(10) 2.512 ? . 2_577
H(10) F(1) 3.401 ? . 1_455
H(10) C(4) 2.700 ? . .
H(10) C(5) 2.653 ? . .
H(10) C(6) 3.331 ? . 2_566
H(10) C(7) 3.227 ? . 2_566
H(10) C(12) 2.041 ? . .
H(10) C(13) 3.250 ? . .
H(10) C(15) 3.217 ? . .
H(10) C(16) 2.025 ? . .
H(10) C(16) 3.458 ? . 2_577
H(10) H(2) 2.139 ? . .
H(10) H(3) 3.392 ? . 2_566
H(10) H(8) 3.383 ? . 1_455
H(10) H(9) 2.335 ? . .
H(10) H(9) 2.512 ? . 2_577


#==============================================================================

# Additional structures and associated data_? identifiers
# should be added at this point if there is more than one 
# structure analysis in the CIF.

#==============================================================================

#===END

#==============================================================================

#     End of CIF

#==============================================================================
